# Supplementary material for: Risk of morbidity and mortality in patients with type 2 diabetes treated with sodium-glucose cotransporter-2 inhibitor and/or dipeptidyl peptidase-4 inhibitor: a nationwide study
Source: PubMed Central journal article supplement — BMJ Open Diabetes Res Care. 2021 Jan 20;9(1):e001765. doi: 10.1136/bmjdrc-2020-001765 (PMC7818813; doi:10.1136/bmjdrc-2020-001765), 2021-01-20
Supplement: bmjdrc-2020-001765supp002.pdf [file bmjdrc-2020-001765supp002.pdf]

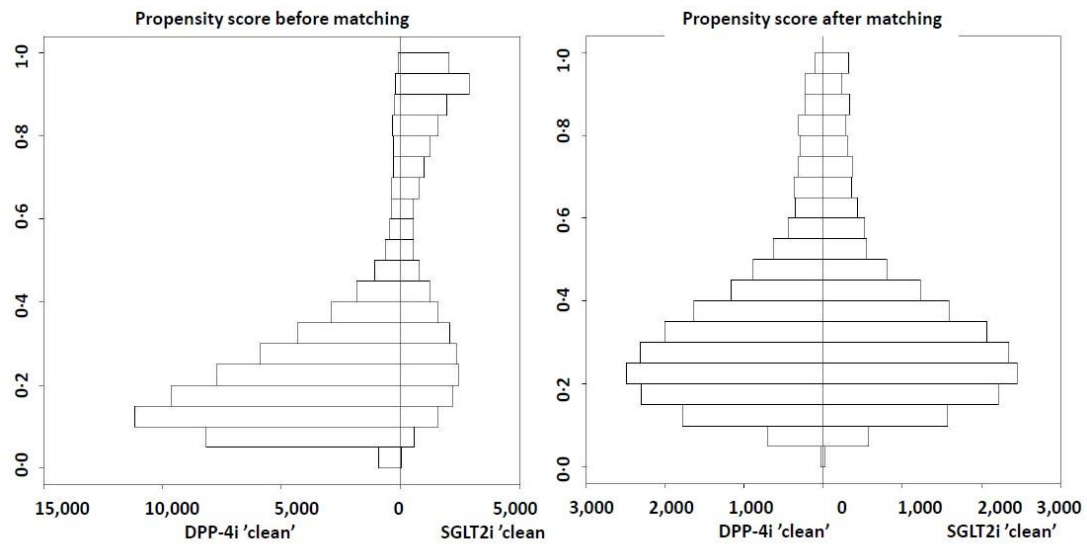

**Supplementary Figure 2: Distribution of the propensity scores prior to and after propensity score matching in the SGLT2i 'clean' vs the DPP-4i 'clean' cohorts.**
