# Supplementary material for: Risk of morbidity and mortality in patients with type 2 diabetes treated with sodium-glucose cotransporter-2 inhibitor and/or dipeptidyl peptidase-4 inhibitor: a nationwide study
Source: PubMed Central journal article supplement — BMJ Open Diabetes Res Care. 2021 Jan 20;9(1):e001765. doi: 10.1136/bmjdrc-2020-001765 (PMC7818813; doi:10.1136/bmjdrc-2020-001765), 2021-01-20
Supplement: bmjdrc-2020-001765supp004.pdf [file bmjdrc-2020-001765supp004.pdf]

**Supplementary Table 1: Baseline characteristics of the SGLT2i 'clean' vs the DPP-4i 'clean' cohorts prior to and following propensity score matching.**

|                                           | UNMATCHED         |                |       | PROPENSITY SCORE-MATCHED |                   |       |
|-------------------------------------------|-------------------|----------------|-------|--------------------------|-------------------|-------|
|                                           | SGLT2i<br>'clean' | DPP-4i 'clean' | SMD   | SGLT2i 'clean'           | DPP-4i<br>'clean' | SMD   |
| Days on DPP4i since diagnosis (mean (SD)) | 93 (276)          | 39 (179)       | 0.232 | 65 (230)                 | 58 (231)          | 0.028 |
| Days from diagnosis to index (mean (SD))  | 2,132 (900)       | 1,758 (948)    | 0.404 | 1,913 (958)              | 1,875 (980)       | 0.039 |
| Ratio of days (mean (SD))                 | 0.04 (0.11)       | 0.02 (0.08)    | 0.211 | 0.03 (0.09)              | 0.02 (0.09)       | 0.026 |
| Year of DM diagnosis (%)                  |                   |                | 0.262 |                          |                   | 0.041 |
| ≤ 2009                                    | 17,604 (62.9)     | 28,857 (50.7)  |       | 9,760 (52.5)             | 9,617 (51.8)      |       |
| - 2010                                    | 2,014 (7.2)       | 4,833 (8.5)    |       | 1,541 (8.3)              | 1,449 (7.8)       |       |
| - 2011                                    | 1,633 (5.8)       | 4,284 (7.5)    |       | 1,311 (7.1)              | 1,321 (7.1)       |       |
| - 2012                                    | 1,308 (4.7)       | 3,585 (6.3)    |       | 1,104 (5.9)              | 1,125 (6.1)       |       |
| - 2013                                    | 1,226 (4.4)       | 3,250 (5.7)    |       | 1,048 (5.6)              | 994 (5.3)         |       |
| - 2014                                    | 1267 (4.5)        | 4236 (7.4)     |       | 1106 (6.0)               | 1194 (6.4)        |       |
| - 2015                                    | 1243 (4.4)        | 3923 (6.9)     |       | 1144 (6.2)               | 1186 (6.4)        |       |
| - 2016                                    | 1178 (4.2)        | 2900 (5.1)     |       | 1087 (5.8)               | 1151 (6.2)        |       |
| - 2017                                    | 507 (1.8)         | 1067 (1.9)     |       | 482 (2.6)                | 546 (2.9)         |       |

|                                 |               |               |       |              |              |        |
|---------------------------------|---------------|---------------|-------|--------------|--------------|--------|
| Index year (%)                  |               |               | 0.580 |              |              | 0.153  |
| - 2014                          | 598 (2.1)     | 7532 (13.2)   |       | 570 (3.1)    | 1081 (5.8)   |        |
| - 2015                          | 6045 (21.6)   | 19474 (34.2)  |       | 4674 (25.2)  | 4481 (24.1)  |        |
| - 2016                          | 12543 (44.8)  | 19065 (33.5)  |       | 7902 (42.5)  | 7145 (38.4)  |        |
| - 2017                          | 8794 (31.4)   | 10864 (19.1)  |       | 5437 (29.3)  | 5876 (31.6)  |        |
| AMI with PCI n (%)              | 841 (3.0)     | 1,590 (2.8)   | 0.013 | 508 (2.7)    | 499 (2.7)    | 0.003  |
| CABG surgery n (%)              | 352 (1.3)     | 616(1.1)      | 0.016 | 182 (1.0)    | 181 (1.0)    | 0.001  |
| PCI with stenting n (%)         | 1,565 (5.6)   | 2,777 (4.9)   | 0.032 | 909 (4.9)    | 903 (4.9)    | 0.001  |
| Chronic heart failure n (%)     | 1,417 (5.1)   | 2,984 (5.2)   | 0.008 | 799 (4.3)    | 788 (4.2)    | 0.003  |
| Atrial fibrillation n (%)       | 1,507 (5.4)   | 4,057 (7.1)   | 0.072 | 1036 (5.6)   | 1034 (5.6)   | <0.001 |
| Stroke n (%)                    | 1,113 (4.0)   | 2,992 (5.3)   | 0.061 | 733 (3.9)    | 799 (4.3)    | 0.018  |
| Peripheral artery disease n (%) | 978 (3.5)     | 2,257 (4.0)   | 0.025 | 564 (3.0)    | 593 (3.2)    | 0.009  |
| Lower limb amputation n (%)     | 361 (1.3)     | 460 (0.8)     | 0.047 | 164 (0.9)    | 151 (0.8)    | 0.008  |
| Cancer n (%)                    | 1,872 (6.7)   | 5,178 (9.1)   | 0.089 | 1,297 (7.0)  | 1,305 (7.0)  | 0.002  |
| COPD n (%)                      | 1,441 (5.2)   | 2,879 (5.1)   | 0.004 | 900 (4.8)    | 862 (4.6)    | 0.010  |
| Severe hypoglycemia n (%)       | 64 (0.2)      | 103 (0.2)     | 0.011 | 33 (0.2)     | 30 (0.2)     | 0.004  |
| Keto-lactic acidosis n (%)      | 63 (0.2)      | 43 (0.1)      | 0.039 | 21 (0.1)     | 22 (0.1)     | 0.002  |
| Major bleeding n (%)            | 538 (1.9)     | 1,212 (2.1)   | 0.015 | 328 (1.8)    | 348 (1.9)    | 0.008  |
| Metformin n (%)                 | 14,626 (52.3) | 30,862 (54.2) | 0.039 | 9,764 (52.5) | 9,741 (52.4) | 0.002  |

|                                           |               |               |       |               |               |       |
|-------------------------------------------|---------------|---------------|-------|---------------|---------------|-------|
| Sulfonylurea n (%)                        | 10,375 (37.1) | 29,801 (52.3) | 0.311 | 8,979 (48.3)  | 8,931 (48.1)  | 0.005 |
| GLP-1RA n (%)                             | 2,693 (9.6)   | 917 (1.6)     | 0.353 | 1,091 (5.9)   | 877 (4.7)     | 0.051 |
| Metiglinides n (%)                        | 25 (0.1)      | 60 (0.1)      | 0.005 | 20 (0.1)      | 27 (0.1)      | 0.011 |
| Metformin + metiglinid n (%)              | 380 (1.4)     | 560 (1.0)     | 0.035 | 327 (1.8)     | 289 (1.6)     | 0.016 |
| Glitazones n (%)                          | 122 (0.4)     | 199 (0.3)     | 0.014 | 100 (0.5)     | 97 (0.5)      | 0.002 |
| Acarbose n (%)                            | 774 (2.8)     | 2830 (5.0)    | 0.114 | 674 (3.6)     | 698 (3.8)     | 0.007 |
| Insulin n (%)                             | 11,219 (40.1) | 3,042 (5.3)   | 0.911 | 2,932 (15.8)  | 2,555 (13.7)  | 0.057 |
| Short acting insulin (Human/analog) n (%) | 8,052 (28.8)  | 1,245 (2.2)   | 0.790 | 1,414 (7.6)   | 1,202 ( 6.5)  | 0.045 |
| Intermediate insulin (human basal) n (%)  | 5,140 (18.4)  | 1,575 (2.8)   | 0.525 | 1,460 (7.9)   | 1,230 (6.6)   | 0.048 |
| Long acting insulin (analog basal) n (%)  | 6,856 (24.5)  | 1,146 (2.0)   | 0.703 | 1,280 (6.9)   | 1,048 (5.6)   | 0.052 |
| Premix insulin (human/analog) n (%)       | 1,704 (6.1)   | 455 (0.8)     | 0.293 | 573 (3.1)     | 426 (2.3)     | 0.049 |
| CV risk treatment n (%)                   | 25,696 (91.8) | 51,214 (90.0) | 0.066 | 16,860 (90.7) | 16,481 (88.7) | 0.067 |
| Low dose Aspirin n (%)                    | 9,074 (32.4)  | 16,813 (29.5) | 0.063 | 5,444 (29.3)  | 5,405 (29.1)  | 0.005 |
| Statin n (%)                              | 14,339 (51.2) | 27,431 (48.2) | 0.061 | 8,916 (48.0)  | 8,823 (47.5)  | 0.010 |
| Antihypertensives n (%)                   | 24,539 (87.7) | 48,664 (85.5) | 0.065 | 16,018 (86.2) | 15,687 (84.4) | 0.050 |
| ACEi n (%)                                | 16,300 (58.3) | 33,242 (58.4) | 0.003 | 10,645 (57.3) | 10,631 (57.2) | 0.002 |
| ARB n (%)                                 | 8,405 (30.0)  | 15,505 (27.2) | 0.062 | 5,304 (28.5)  | 5,254 (28.3)  | 0.006 |
| Dihydropyridine CCB n (%)                 | 6,140 (21.9)  | 13,067 (23.0) | 0.024 | 3,964 (21.3)  | 4,041 (21.7)  | 0.010 |
| Non-dihydropyridine CCB n (%)             | 368 (1.3)     | 795 (1.4)     | 0.007 | 228 (1.2)     | 210 (1.1)     | 0.009 |

|                                       |               |               |        |              |              |        |
|---------------------------------------|---------------|---------------|--------|--------------|--------------|--------|
| Beta blockers n (%)                   | 15,648 (55.9) | 29,807 (52.4) | 0.072  | 9,885 (53.2) | 9,805 (52.8) | 0.009  |
| Thiazides n (%)                       | 177 (0.6)     | 409 (0.7)     | 0.010  | 107 (0.6)    | 105 (0.6)    | 0.001  |
| Loop diuretics n (%)                  | 5,472 (19.6)  | 10,220 (18.0) | 0.041  | 3,046 (16.4) | 3,041 (16.4) | 0.001  |
| Aldosterone antagonist n (%)          | 2,096 (7.5)   | 3,550 (6.2)   | 0.050  | 1,200 (6.5)  | 1,150 (6.2)  | 0.011  |
| Digoxin n (%)                         | 452 (1.6)     | 1,203 (2.1)   | 0.037  | 300 (1.6)    | 322 (1.7)    | 0.009  |
| Digitoxin n (%)                       | 186 (0.7)     | 639 (1.1)     | 0.049  | 126 (0.7)    | 109 (0.6)    | 0.012  |
| Amiodarone n (%)                      | 275 (1.0)     | 674 (1.2)     | 0.019  | 182 (1.0)    | 170 (0.9)    | 0.007  |
| Warfarin n (%)                        | 638 (2.3)     | 1,391 (2.4)   | 0.011  | 404 (2.2)    | 417 (2.2)    | 0.005  |
| P2Y12 receptor antagonists n (%)      | 2,755 (9.8)   | 5,910 (10.4)  | 0.018  | 1,680 (9.0)  | 1,738 (9.4)  | 0.011  |
| Factor X <sub>A</sub> inhibitor n (%) | 328 (1.2)     | 730 (1.3)     | 0.010  | 228 (1.2)    | 215 (1.2)    | 0.006  |
| Direct thrombin inhibitor n (%)       | 129 (0.5)     | 263 (0.5)     | <0.001 | 92 (0.5)     | 97 (0.5)     | 0.004  |
| Other antiplatelets n (%)             | 60 (0.2)      | 144 (0.3)     | 0.008  | 40 (0.2)     | 44 (0.2)     | 0.005  |
| Corticosteroids n (%)                 | 1,236 (4.4)   | 2,794 (4.9)   | 0.023  | 845 (4.5)    | 851 (4.6)    | 0.002  |
| Weight loss medication n (%)          | <10 (0.0)     | <10 (0.0)     | 0.009  | <10 (0.0)    | <10 (0.0)    | <0.001 |

ata include some demographic parameters, significant co-morbidities as well as anti-diabetic and cardiovascular medications.

=angiotensin-converting enzyme inhibitors, ARB=angiotensin-II receptor blockers, CCB=calcium channel blockers, CV = vascular,

SMD=standardized mean difference
