# Supplementary material for: Risk of morbidity and mortality in patients with type 2 diabetes treated with sodium-glucose cotransporter-2 inhibitor and/or dipeptidyl peptidase-4 inhibitor: a nationwide study
Source: PubMed Central journal article supplement — BMJ Open Diabetes Res Care. 2021 Jan 20;9(1):e001765. doi: 10.1136/bmjdrc-2020-001765 (PMC7818813; doi:10.1136/bmjdrc-2020-001765), 2021-01-20
Supplement: bmjdrc-2020-001765supp005.pdf [file bmjdrc-2020-001765supp005.pdf]

**Supplementary Table 2: Baseline characteristics of the SGLT2i 'add-on' vs the SGLT2i 'switch' cohorts prior to and after propensity score matching.**

|                                          | UNMATCHED       |                 |       | PROPENSITY-SCORE MATCHED |              |       |
|------------------------------------------|-----------------|-----------------|-------|--------------------------|--------------|-------|
|                                          | SGLT2i 'add-on' | SGLT2i 'switch' | SMD   | SGLT2i                   | SGLT2i       | SMD   |
|                                          |                 |                 |       | 'add-on'                 | 'switch'     |       |
| Number of patients                       | 7,167           | 4,891           |       | 4,843                    | 4,843        |       |
| Female gender n (%)                      | 3,088 (43.1)    | 2,329 (47.6)    | 0.091 | 2,192 (45.3)             | 2,300 (47.5) | 0.045 |
| Age at diagnosis of DM (mean (SD))       | 54.6 (9.1)      | 54.0 (9.1)      | 0.073 | 54.3 (9.1)               | 54.0 (9.1)   | 0.028 |
| Age at index date (mean (SD))            | 61.0 (9.4)      | 60.2 (9.4)      | 0.079 | 60.5 (9.5)               | 60.3 (9.4)   | 0.030 |
| Days on DPP4 since diagnosis (mean (SD)) | 1,026 (738)     | 967 (708)       | 0.082 | 1,000 (734)              | 969 (708)    | 0.041 |
| Days from diagnosis to index (mean (SD)) | 2305 (689)      | 2280 (682)      | 0.037 | 2291 (689)               | 2282 (681)   | 0.014 |
| Ratio of days (mean (SD))                | 0.31 (2.87)     | 0.22 (1.01)     | 0.043 | 0.23 (1.68)              | 0.22 (1.02)  | 0.005 |
| Year of DM diagnosis (%)                 |                 |                 | 0.059 |                          |              | 0.056 |
| ≤ 2009                                   | 4,914 (68.6)    | 3,334 (68.2)    |       | 3,269 (67.5)             | 3,303 (68.2) |       |
| - 2010                                   | 630 (8.8)       | 410 (8.4)       |       | 443 (9.1)                | 406 (8.4)    |       |
| - 2011                                   | 491 (6.9)       | 357 (7.3)       |       | 356 (7.4)                | 352 (7.3)    |       |
| - 2012                                   | 346 (4.8)       | 265 (5.4)       |       | 247 (5.1)                | 262 (5.4)    |       |
| - 2013                                   | 287 (4.0)       | 213 (4.4)       |       | 194 (4.0)                | 213 (4.4)    |       |
| - 2014                                   | 237 (3.3)       | 144 (2.9)       |       | 159 (3.3)                | 142 (2.9)    |       |
| - 2015                                   | 164 (2.3)       | 119 (2.4)       |       | 108 (2.2)                | 117 (2.4)    |       |
| - 2016                                   | 79 (1.1)        | 43 (0.9)        |       | 60 (1.2)                 | 42 (0.9)     |       |
| - 2017                                   | 19 (0.3)        | 6 (0.1)         |       | 7 (0.1)                  | 6 (0.1)      |       |
| Index year (%)                           |                 |                 | 0.084 |                          |              | 0.077 |

|                                 |              |              |        |              |              |        |
|---------------------------------|--------------|--------------|--------|--------------|--------------|--------|
| - 2014                          | 192 (2.7)    | 178 (3.6)    |        | 133 (2.7)    | 177 (3.7)    |        |
| - 2015                          | 1,708 (23.8) | 1,270 (26.0) |        | 1,170 (24.2) | 1,251 (25.8) |        |
| - 2016                          | 3,176 (44.3) | 2,017 (41.2) |        | 2,147 (44.3) | 1,998 (41.3) |        |
| - 2017                          | 2,091 (29.2) | 1,426 (29.2) |        | 1,393 (28.8) | 1,417 (29.3) |        |
| AMI with PCI n (%)              | 173 (2.4)    | 147 (3.0)    | 0.036  | 132 (2.7)    | 139 (2.9)    | 0.009  |
| CABG surgery n (%)              | 92 (1.3)     | 44 (0.9)     | 0.037  | 58 (1.2)     | 44 (0.9)     | 0.028  |
| PCI with stenting n (%)         | 341 (4.8)    | 263 (5.4)    | 0.028  | 248 (5.1)    | 255 (5.3)    | 0.007  |
| Chronic heart failure n (%)     | 239 (3.3)    | 166 (3.4)    | 0.003  | 159 (3.3)    | 161 (3.3)    | 0.002  |
| Atrial fibrillation n (%)       | 412 (5.7)    | 232 (4.7)    | 0.045  | 259 (5.3)    | 230 (4.7)    | 0.027  |
| Stroke n (%)                    | 265 (3.7)    | 155 (3.2)    | 0.029  | 166 (3.4)    | 155 (3.2)    | 0.013  |
| Peripheral artery disease n (%) | 174 (2.4)    | 145 (3.0)    | 0.033  | 115 (2.4)    | 142 (2.9)    | 0.035  |
| Lower limb amputation n (%)     | 34 (0.5)     | 31 (0.6)     | 0.021  | 24 (0.5)     | 29 (0.6)     | 0.014  |
| Cancer n (%)                    | 480 (6.7)    | 328 (6.7)    | <0.001 | 335 (6.9)    | 324 (6.7)    | 0.009  |
| COPD n (%)                      | 268 (3.7)    | 208 (4.3)    | 0.026  | 195 (4.0)    | 202 (4.2)    | 0.007  |
| Severe hypoglycemia n (%)       | <10 (0.1)    | <10 (0.1)    | 0.010  | <10 (0.1)    | <10 (0.1)    | <0.001 |
| Keto-/lactic acidosis n (%)     | <10 (0.0)    | <10 (0.1)    | 0.029  | <10 (0.0)    | <10 (0.1)    | 0.020  |
| Major bleeding n (%)            | 126 (1.8)    | 70 (1.4)     | 0.026  | 75 (1.5)     | 70 (1.4)     | 0.009  |
| Metformin n (%)                 | 1,600 (22.3) | 1,555 (31.8) | 0.214  | 1,263 (26.1) | 1,511 (31.2) | 0.113  |
| Sulphonylurea n (%)             | 4,210 (58.7) | 3,146 (64.3) | 0.115  | 2,931 (60.5) | 3,109 (64.2) | 0.076  |
| GLP-1RA n (%)                   | 162 (2.3)    | 149 (3.0)    | 0.049  | 132 (2.7)    | 141 (2.9)    | 0.011  |
| Metiglinides n (%)              | 10 (0.1)     | <10 (0.1)    | 0.005  | <10 (0.1)    | <10 (0.1)    | 0.006  |
| Metformin + metiglinid n (%)    | 40 (0.6)     | 17 (0.3)     | 0.031  | 25 (0.5)     | 17 (0.4)     | 0.025  |
| Glitazones n (%)                | 48 (0.7)     | 20 (0.4)     | 0.036  | 21 (0.4)     | 20 (0.4)     | 0.003  |
| Acarbose n (%)                  | 389 (5.4)    | 167 (3.4)    | 0.098  | 224 (4.6)    | 167 (3.4)    | 0.060  |
| Insulin n (%)                   | 350 (4.9)    | 362 (7.4)    | 0.105  | 275 (5.7)    | 330 (6.8)    | 0.047  |

|                                           |              |              |       |              |              |        |
|-------------------------------------------|--------------|--------------|-------|--------------|--------------|--------|
| Short acting insulin (Human/analog) n (%) | 87 (1.2)     | 100 (2.0)    | 0.066 | 77 (1.6)     | 88 (1.8)     | 0.018  |
| Intermediate insulin (human basal) n (%)  | 168 (2.3)    | 175 (3.6)    | 0.073 | 137 (2.8)    | 161 (3.3)    | 0.029  |
| Long acting insulin (analog basal) n (%)  | 184 (2.6)    | 177 (3.6)    | 0.061 | 141 (2.9)    | 161 (3.3)    | 0.024  |
| Premix insulin (human/analog) n (%)       | 22 (0.3)     | 35 (0.7)     | 0.057 | 19 (0.4)     | 28 (0.6)     | 0.027  |
| CV risk treatment n (%)                   | 6,631 (92.5) | 4,506 (92.1) | 0.015 | 4,479 (92.5) | 4,460 (92.1) | 0.015  |
| Low dose Aspirin n (%)                    | 2,149 (30.0) | 1,618 (33.1) | 0.067 | 1,506 (31.1) | 1,593 (32.9) | 0.039  |
| Statin n (%)                              | 3,863 (53.9) | 2,590 (53.0) | 0.019 | 2,599 (53.7) | 2,556 (52.8) | 0.018  |
| Antihypertensives n (%)                   | 6,276 (87.6) | 4,270 (87.3) | 0.008 | 4,233 (87.4) | 4,225 (87.2) | 0.005  |
| ACEi n (%)                                | 4,017 (56.0) | 2,797 (57.2) | 0.023 | 2,756 (56.9) | 2,767 (57.1) | 0.005  |
| ARB n (%)                                 | 2,266 (31.6) | 1,407 (28.8) | 0.062 | 1,470 (30.4) | 1,397 (28.8) | 0.033  |
| Dihydropyridine CCB n (%)                 | 1,536 (21.4) | 984 (20.1)   | 0.032 | 1,022 (21.1) | 977 (20.2)   | 0.023  |
| Non-dihydropyridine CCB n (%)             | 101 (1.4)    | 74 (1.5)     | 0.009 | 73 (1.5)     | 68 (1.4)     | 0.009  |
| Beta blockers n (%)                       | 3,735 (52.1) | 2,628 (53.7) | 0.032 | 2,568 (53.0) | 2,596 (53.6) | 0.012  |
| Thiazides n (%)                           | 40 (0.6)     | 30 (0.6)     | 0.007 | 34 (0.7)     | 28 (0.6)     | 0.016  |
| Loop diuretics n (%)                      | 927 (12.9)   | 664 (13.6)   | 0.019 | 636 (13.1)   | 650 (13.4)   | 0.009  |
| Aldosterone antagonist n (%)              | 321 (4.5)    | 258 (5.3)    | 0.037 | 223 (4.6)    | 251 (5.2)    | 0.027  |
| Digoxin n (%)                             | 119 (1.7)    | 72 (1.5)     | 0.015 | 77 (1.6)     | 70 (1.4)     | 0.012  |
| Digitoxin n (%)                           | 37 (0.5)     | 24 (0.5)     | 0.004 | 23 (0.5)     | 24 (0.5)     | 0.003  |
| Amiodarone n (%)                          | 61 (0.9)     | 29 (0.6)     | 0.031 | 32 (0.7)     | 28 (0.6)     | 0.011  |
| Warfarin n (%)                            | 141 (2.0)    | 85 (1.7)     | 0.017 | 91 (1.9)     | 84 (1.7)     | 0.011  |
| P2Y12 receptor antagonists n (%)          | 701 (9.8)    | 460 (9.4)    | 0.013 | 451 (9.3)    | 451 (9.3)    | <0.001 |
| Factor X <sub>A</sub> inhibitor n (%)     | 84 (1.2)     | 52 (1.1)     | 0.010 | 52 (1.1)     | 50 (1.0)     | 0.004  |
| Direct thrombin inhibitor n (%)           | 39 (0.5)     | 19 (0.4)     | 0.023 | 25 (0.5)     | 19 (0.4)     | 0.018  |
| Other antiplatelets n (%)                 | 15 (0.2)     | 11 (0.2)     | 0.003 | 13 (0.3)     | 11 (0.2)     | 0.008  |
| Corticosteroids n (%)                     | 263 (3.7)    | 189 (3.9)    | 0.010 | 180 (3.7)    | 186 (3.8)    | 0.006  |
| Weight loss medication n (%)              | <10 (0.0)    | <10 (0.0)    | 0.005 | <10 (0.0)    | <10 (0.0)    | <0.001 |

The data include some demographic parameters (age and gender), significant co-morbidities as well as anti-diabetic and cardiovascular medications. ACEi = angiotensin-converting enzyme inhibitors, ARB = angiotensin-II receptor blockers, CCB = calcium channel blockers, CV = cardiovascular, SMD = standardized mean difference

---
