# Supplementary material for: Risk of morbidity and mortality in patients with type 2 diabetes treated with sodium-glucose cotransporter-2 inhibitor and/or dipeptidyl peptidase-4 inhibitor: a nationwide study
Source: PubMed Central journal article supplement — BMJ Open Diabetes Res Care. 2021 Jan 20;9(1):e001765. doi: 10.1136/bmjdrc-2020-001765 (PMC7818813; doi:10.1136/bmjdrc-2020-001765), 2021-01-20
Supplement: bmjdrc-2020-001765supp006.pdf [file bmjdrc-2020-001765supp006.pdf]

**Supplementary Table 3: ICD-10 and ICPM codes used in the study.**

| Diagnosis/intervention | Description                                                                                                                                                                             | ICD codes                             | ICPM codes                                  |
|------------------------|-----------------------------------------------------------------------------------------------------------------------------------------------------------------------------------------|---------------------------------------|---------------------------------------------|
| AMI with PCI           | Occurrence of defined ICD codes in inpatient                                                                                                                                            | I2100, I2110, I2120, I2130,           | 12730, 12731, 12740, 12750, 12751,          |
|                        | I2140, records as primary or secondary diagnosis                                                                                                                                        | I2190, I2200, I2210, I2280,           | 12752, 12754, 12760, 12780, 33970,          |
|                        | I2290, together with defined ICPM codes within $\pm$ 30                                                                                                                                 | I2300, I2310, I2320, I2330,           | 33971, 33972, 33974, 33975, 33976,          |
|                        | I2340,                                                                                                                                                                                  |                                       | 33981, 33982, 33983, 33984, 33985,          |
|                        | days                                                                                                                                                                                    | I2350, I2360, I2370, I2380, I2390     | 33986, 33987, 33988, 33989                  |
| Stroke                 | Stroke as primary diagnosis in inpatient records                                                                                                                                        | I61, I6290, I63, I64                  |                                             |
| LLA                    | ICPM codes in inpatient records                                                                                                                                                         |                                       | 58450, 58460, 58470, 58471, 58480,          |
|                        |                                                                                                                                                                                         |                                       | 58530                                       |
| HHF                    | CHF ICD codes in inpatient records as primary                                                                                                                                           | I50, I42, I110, J81 diagnosis         |                                             |
| Cancer                 | Minimum 2 ICD codes of cancer together with C00 - C99 the criteria of ICD repetition within a period more than 30 days but less than or equal to 365 days in in- and outpatient records |                                       |                                             |
| COPD                   | Minimum 2 ICD codes of COPD together with J43, J44 the criteria of ICD repetition within a period more than 30 days but less than or equal to 365 days (in and outpatient records).     |                                       |                                             |
| Keto-/lactate acidosis | Occurrence of ICD codes in inpatient (primary diagnosis) records.                                                                                                                       | E101, E111, E121, E121, E141,<br>E872 |                                             |
| Lower limb amputations | Occurrence of defined ICPM codes in inpatient records.                                                                                                                                  |                                       | 58450, 58460, 58470, 58471, 58480,<br>58530 |

Major organ specific One occurrence of following bleeding ICD D62, I60, I61, I62, R31, R04, D500, bleeding codes in inpatient (primary diagnosis) records. H313, H356, H431, H450, I312, I850, K250, K252, K254, K256,

K260, K262, K264, K266, K270,  
K272, K274, K276, K280, K282,  
K284, K286, K625, K661, K920,  
K921, K922, S064, S065, S066,  
J942, K228F, K298A, K638B,  
K638C, K838F, K868G, I864A,  
H052A, S368D, G951A

Periferial arterial disease Occurrence of defined ICD codes in inpatient I701, I702, I703, I704, I705, I706,

(PAD) (primary diagnosis) records. I707, I708, I709, I7039

PCI with stent Occurrence of defined ICPM codes in inpatient 33970, 33971, 33972, 33974, 33975,

records. 33976, 33981, 33982, 33983, 33984,

33985, 33986, 33987, 33988, 33989 Severe

hypoglycemia Occurrence of ICD codes in inpatient (primary E100, E110, E120, E130, E140,

diagnosis) records. E160, E161, E162

ICD-10 = international Classification of Diseases Version 10, ICPM = Hungarian modification of International Classification of Procedures in Medicine (ICPM) published in 1978. AMI = Acute myocardial infarction, PCI = percutaneous coronary stent implantation, LLA = Lower limb amputation, HHF = hospitalization for heart failure.
