# Supplementary material for: Risk of morbidity and mortality in patients with type 2 diabetes treated with sodium-glucose cotransporter-2 inhibitor and/or dipeptidyl peptidase-4 inhibitor: a nationwide study
Source: PubMed Central journal article supplement — BMJ Open Diabetes Res Care. 2021 Jan 20;9(1):e001765. doi: 10.1136/bmjdrc-2020-001765 (PMC7818813; doi:10.1136/bmjdrc-2020-001765), 2021-01-20
Supplement: bmjdrc-2020-001765supp007.pdf [file bmjdrc-2020-001765supp007.pdf]

**Supplementary Table 4: Follow up time in the SGLT2i 'clean' vs DPP-4i 'clean' cohorts.**

| Treatment arm  | Before matching |             |               |            |            | After matching |             |               |            |            |
|----------------|-----------------|-------------|---------------|------------|------------|----------------|-------------|---------------|------------|------------|
|                | N of patients   | Mean (days) | Median (days) | 25% (days) | 75% (days) | N of patients  | Mean (days) | Median (days) | 25% (days) | 75% (days) |
| SGLT2i 'clean' | 27,980          | 635         | 700           | 156        | 1,006      | 18,583         | 639         | 673           | 152        | 1,016      |
| DPP-4i 'clean' | 56,935          | 656         | 574           | 147        | 1,071      | 18,583         | 596         | 527           | 142        | 929        |

Number of cases, mean, median values as well as the boundary 25 and 75 percentile are provided.
