# Supplementary material for: Risk of morbidity and mortality in patients with type 2 diabetes treated with sodium-glucose cotransporter-2 inhibitor and/or dipeptidyl peptidase-4 inhibitor: a nationwide study
Source: PubMed Central journal article supplement — BMJ Open Diabetes Res Care. 2021 Jan 20;9(1):e001765. doi: 10.1136/bmjdrc-2020-001765 (PMC7818813; doi:10.1136/bmjdrc-2020-001765), 2021-01-20
Supplement: bmjdrc-2020-001765supp008.pdf [file bmjdrc-2020-001765supp008.pdf]

**Supplementary Table 5: Distribution of SGLT2i therapies at index date before and after propensity score matching in the SGLT2i 'clean' vs DPP-4i 'clean' cohorts.**

| At index date | Before matching |                | After matching   |                |
|---------------|-----------------|----------------|------------------|----------------|
|               | SGLT2i 'clean'  | DPP-4i 'clean' | SGLT2i 'clean'   | DPP-4i 'clean' |
| Total SGLT2i  | 27,980          |                | 18,583           |                |
| Dapagliflozin | 10,029 (35.8%)  |                | 6,876<br>(37.0%) |                |
| Empagliflozin | 17,951 (64.2%)  |                | 11,707 (63.0%)   |                |
| Total DPP-4i  |                 | 56,935         |                  | 18,583         |
| Alogliptin    |                 | 530 (0.9%)     |                  | 130 (0.7%)     |
| Linagliptin   |                 | 5,098 (9.0%)   |                  | 1,462 (7.9%)   |
| Saxagliptin   |                 | 827 (1.5%)     |                  | 207 (1.1%)     |
| Sitagliptin   |                 | 32,398 (56.9%) |                  | 11,072 (59.6%) |
| Vildagliptin  |                 | 18,082 (31.8%) |                  | 5,712 (30.7%)  |

Please note that canagliflozin is not marketed in Hungary, and ertugliflozin was not yet available at the time of analysis.
