# Supplementary material for: Risk of morbidity and mortality in patients with type 2 diabetes treated with sodium-glucose cotransporter-2 inhibitor and/or dipeptidyl peptidase-4 inhibitor: a nationwide study
Source: PubMed Central journal article supplement — BMJ Open Diabetes Res Care. 2021 Jan 20;9(1):e001765. doi: 10.1136/bmjdrc-2020-001765 (PMC7818813; doi:10.1136/bmjdrc-2020-001765), 2021-01-20
Supplement: bmjdrc-2020-001765supp009.pdf [file bmjdrc-2020-001765supp009.pdf]

**Supplementary Table 6: Follow up time in the SGLT2i 'add-on' vs SGLT2i 'switch' cohorts.**

| Treatment arm   | N of patients | Before matching |               |            |            | After matching |             |               |            |            |
|-----------------|---------------|-----------------|---------------|------------|------------|----------------|-------------|---------------|------------|------------|
|                 |               | Mean (days)     | Median (days) | 25% (days) | 75% (days) | N of patients  | Mean (days) | Median (days) | 25% (days) | 75% (days) |
| SGLT2i 'add-on' | 7,167         | 657             | 706           | 200        | 1,014      | 4,843          | 650         | 685           | 193        | 1,010      |
| SGLT2i 'switch' | 4,891         | 733             | 789           | 304        | 1,071      | 4,843          | 733         | 789           | 304        | 1,071      |

Number of cases, mean, median values as well as the boundary 25 and 75 percentile are provided.
