# Supplementary material for: Risk of morbidity and mortality in patients with type 2 diabetes treated with sodium-glucose cotransporter-2 inhibitor and/or dipeptidyl peptidase-4 inhibitor: a nationwide study
Source: PubMed Central journal article supplement — BMJ Open Diabetes Res Care. 2021 Jan 20;9(1):e001765. doi: 10.1136/bmjdrc-2020-001765 (PMC7818813; doi:10.1136/bmjdrc-2020-001765), 2021-01-20
Supplement: bmjdrc-2020-001765supp010.pdf [file bmjdrc-2020-001765supp010.pdf]

**Supplementary Table 7: Distribution of SGLT2i therapies at index date before and after propensity score matching in the SGLT2i 'add-on' vs 'switch' cohorts.**

| At index date | Before matching |                 | After matching  |                 |
|---------------|-----------------|-----------------|-----------------|-----------------|
|               | SGLT2i 'add-on' | SGLT2i 'switch' | SGLT2i 'add-on' | SGLT2i 'switch' |
| Total SGLT2i  | 7,167           | 4,891           | 4,843           | 4,843           |
| Dapagliflozin | 2,673 (37.3%)   | 1,935 (39.6%)   | 1,774 (36.6%)   | 1,911 (39.5%)   |
| Empagliflozin | 4,494 (62.7%)   | 2,956 (60.4%)   | 3,069 (63.4%)   | 2,932 (60.5%)   |

Please note that canagliflozin is not marketed in Hungary, and ertugliflozin was not yet available at the time of analysis.
