# Supplementary material for: Risk of morbidity and mortality in patients with type 2 diabetes treated with sodium-glucose cotransporter-2 inhibitor and/or dipeptidyl peptidase-4 inhibitor: a nationwide study
Source: PubMed Central journal article supplement — BMJ Open Diabetes Res Care. 2021 Jan 20;9(1):e001765. doi: 10.1136/bmjdrc-2020-001765 (PMC7818813; doi:10.1136/bmjdrc-2020-001765), 2021-01-20
Supplement: bmjdrc-2020-001765supp011.pdf [file bmjdrc-2020-001765supp011.pdf]

**Supplementary Table 8: Number of patients needed to treat (NNT) or number needed to harm (NNH) values regarding SGLT2i 'clean' vs DPP-4i 'clean' as well as SGLT2i 'add-on' vs SGLT2i 'switch' comparisons.**

| Outcome             | NNT               | NNH               | NNT                | NNH                |
|---------------------|-------------------|-------------------|--------------------|--------------------|
|                     | SGLT2i 'clean' vs | SGLT2i 'clean' vs | SGLT2i 'add-on' vs | SGLT2i 'add-on' vs |
|                     | DPP-4i 'clean'    | DPP-4i 'clean'    | SGLT2i 'switch'    | SGLT2i 'switch'    |
| AMI with PCI        | n.a.              | n.a.              | n.a.               | n.a.               |
| Stroke with CT      | n.a.              | n.a.              | n.a.               | n.a.               |
| All-cause mortality | 116               | n.a.              | 57                 | n.a.               |
| LLA                 | n.a.              | 313               | n.a.               | n.a.               |
| HHF                 | 117               | n.a.              | n.a.               | n.a.               |
| Cancer              | 94                | n.a.              | n.a.               | n.a.               |

n.a. = not applicable (no significant difference was observed between the compared cohorts)
